# Supplementary material for: A new heterometallic terbium(iii)–ruthenium(ii) complex and its terbium(iii)–zinc(ii) analog: syntheses, characterization, luminescence, and electrochemical properties
Source: Royal Society of Chemistry journal article supplement (doi:10.1039/c5nj00082c), 2015-01-01

## A New Heterometallic Terbium(III)-Ruthenium(II) Complex and its Terbium(III)-Zinc(II) Analog: Syntheses, Characterization, Luminescence, and Electrochemical properties

A. John Maria Xavier, N. Arockia Samy, M. Wilson Bosco Paul, B. Brainard, M. Letticia, and V. Alexander\*

Department of Chemistry, Loyola College, Chennai-600034, India.

### *Supporting Information*

**Figure S1.** FAB mass spectrum of 2-(4-(2,2':6',2'')-terpyridin-4'-yl-benzyloxy)benzaldehyde (**L**<sup>1</sup>).

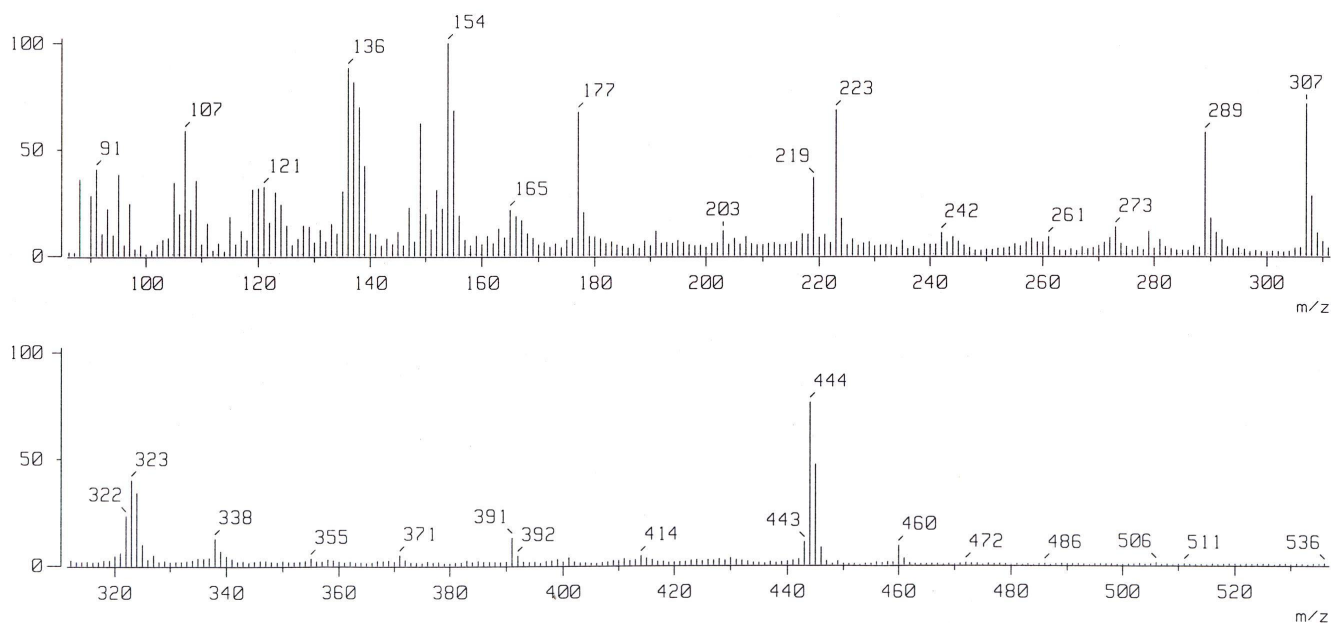

**Figure S2.** 500 MHz  $^1\text{H}$  (a) and 125 MHz  $^{13}\text{C}$  (b) NMR spectrum of 2-(4-(2,2':6',2'')-terpyridin-4'-yl-benzyloxy)benzaldehyde ( $\text{L}^1$ ) in  $\text{CDCl}_3$ .

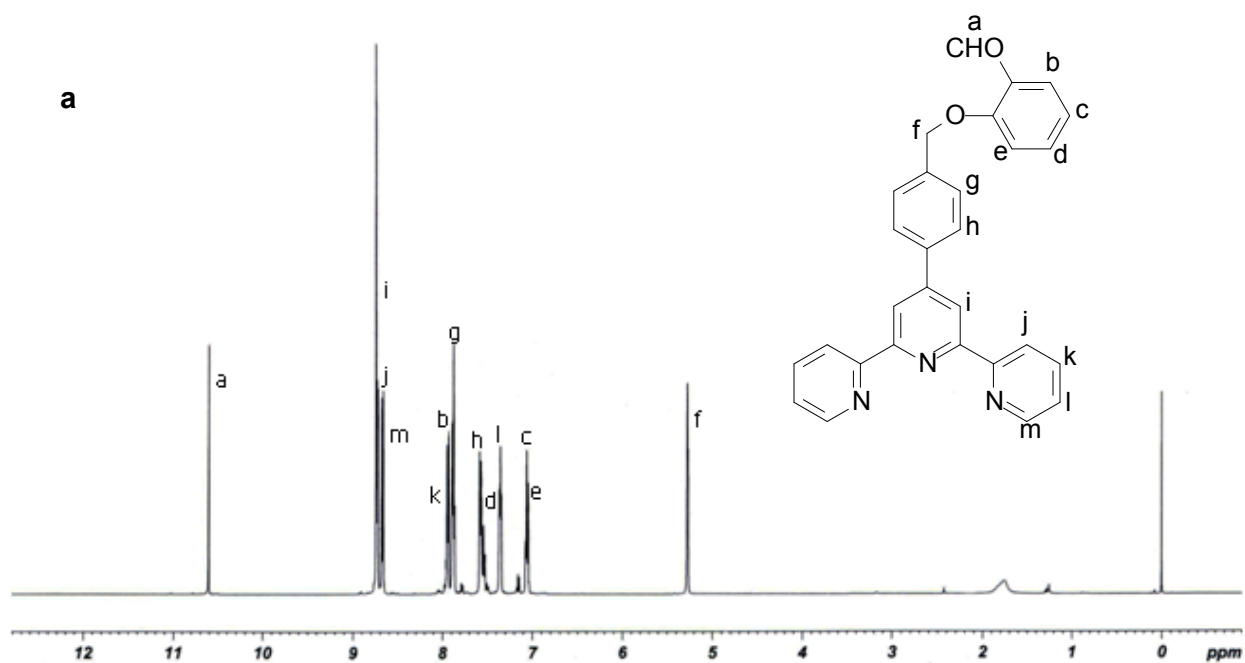

**Figure S3.** ESI mass spectrum of  $L^2$ .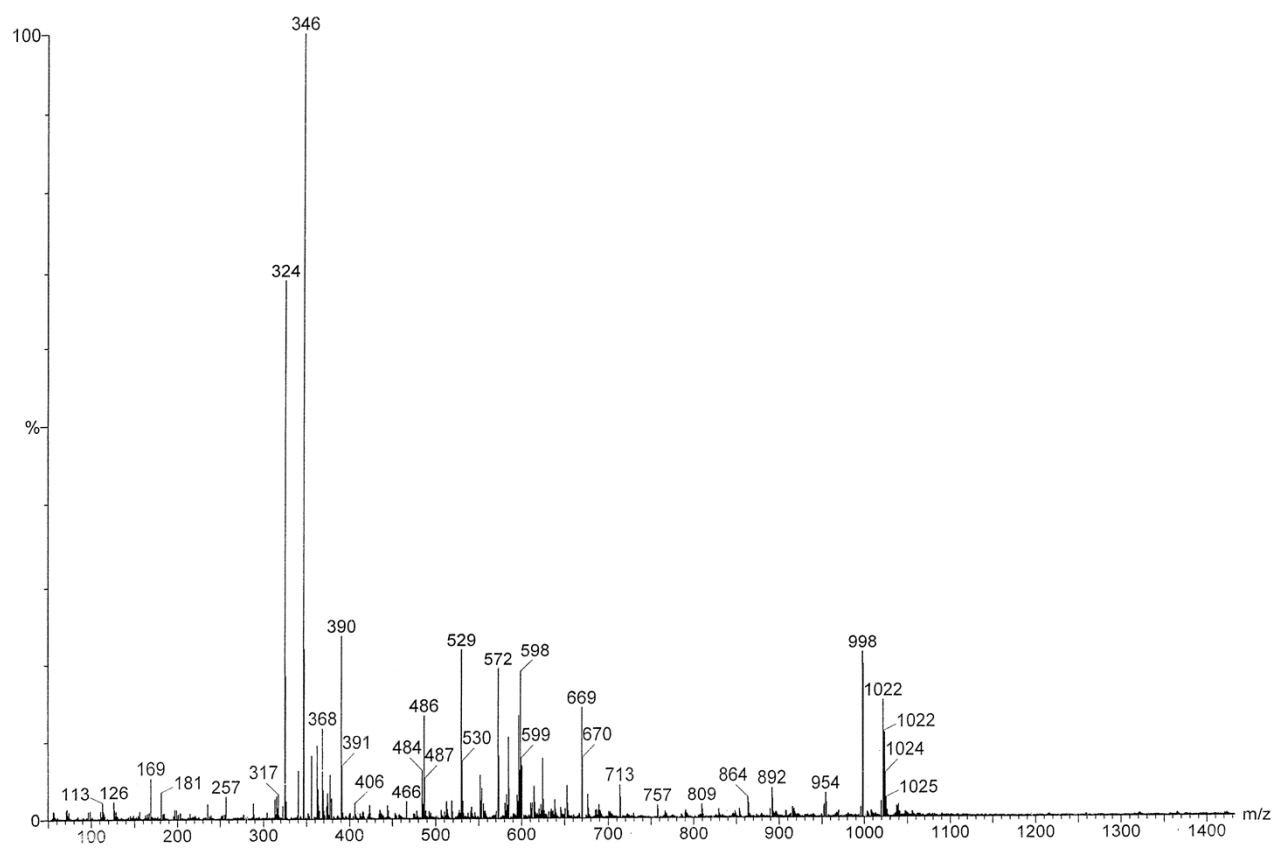

**Figure S4.** 500 MHz  $^1\text{H}$  (a) and 125 MHz  $^{13}\text{C}$  (b) NMR spectrum of  $\text{L}^2$  in  $\text{CDCl}_3$ .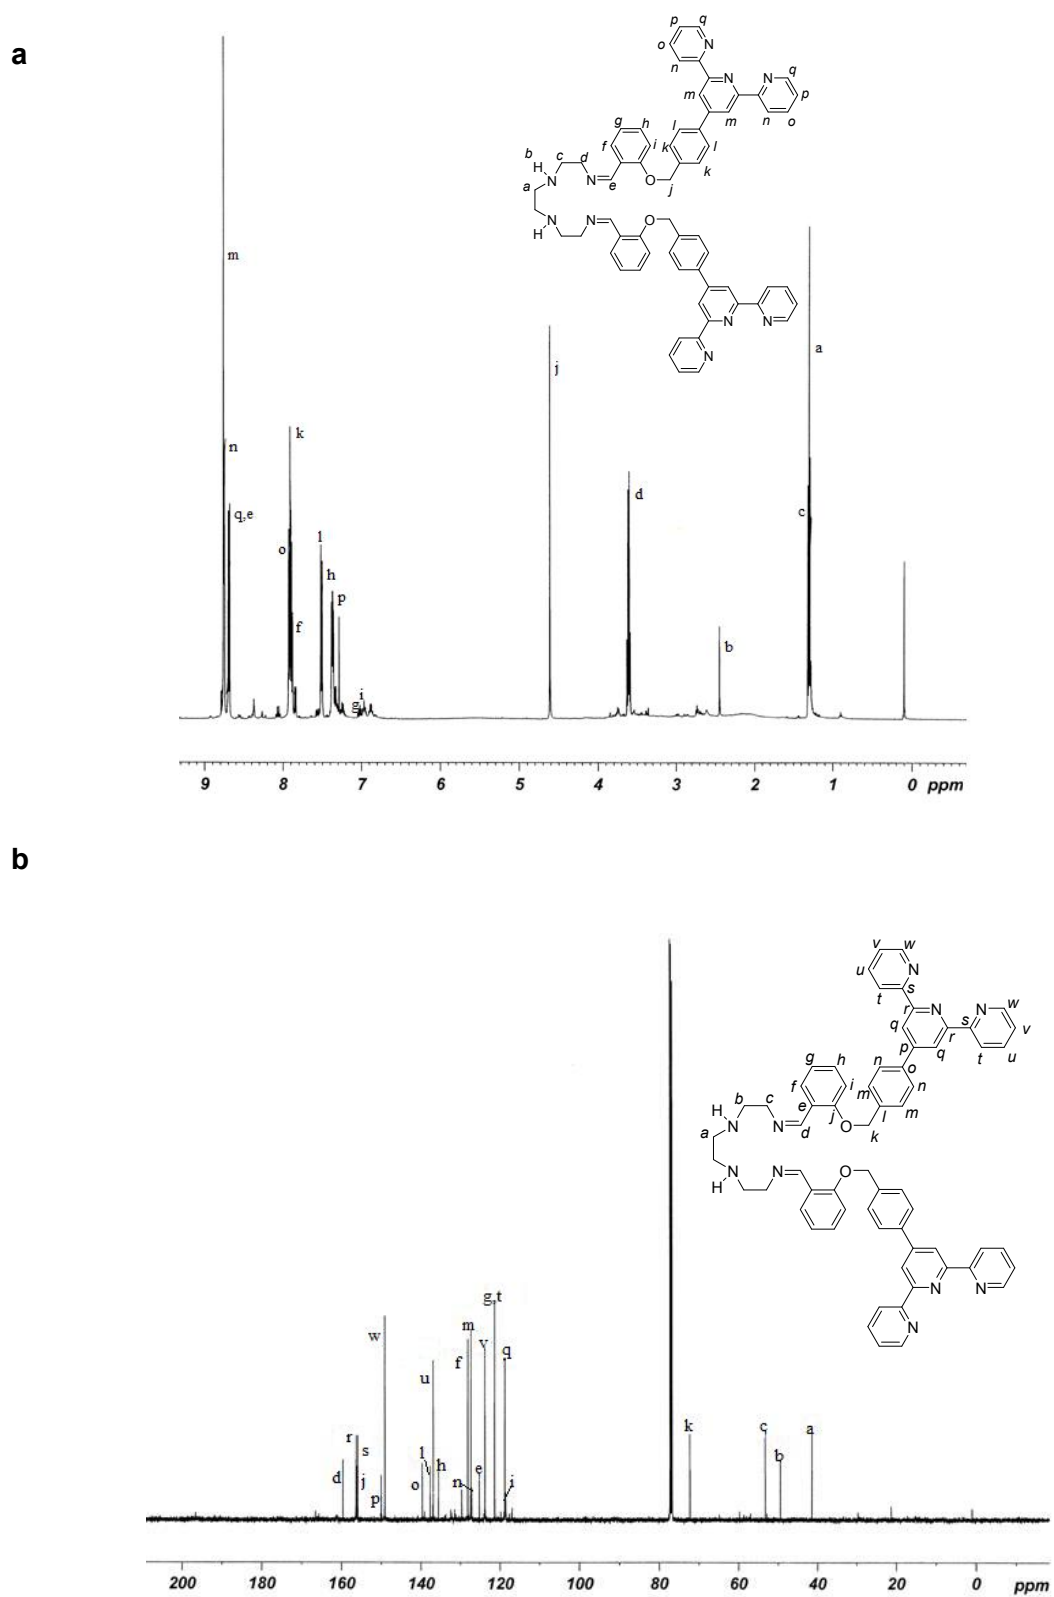

**Figure S5.** MALDI-TOF mass spectrum of  $[\text{Tb}(\text{NO}_3)_2(\text{L}^2)](\text{NO}_3) \cdot 5\text{H}_2\text{O}$  (**2**).

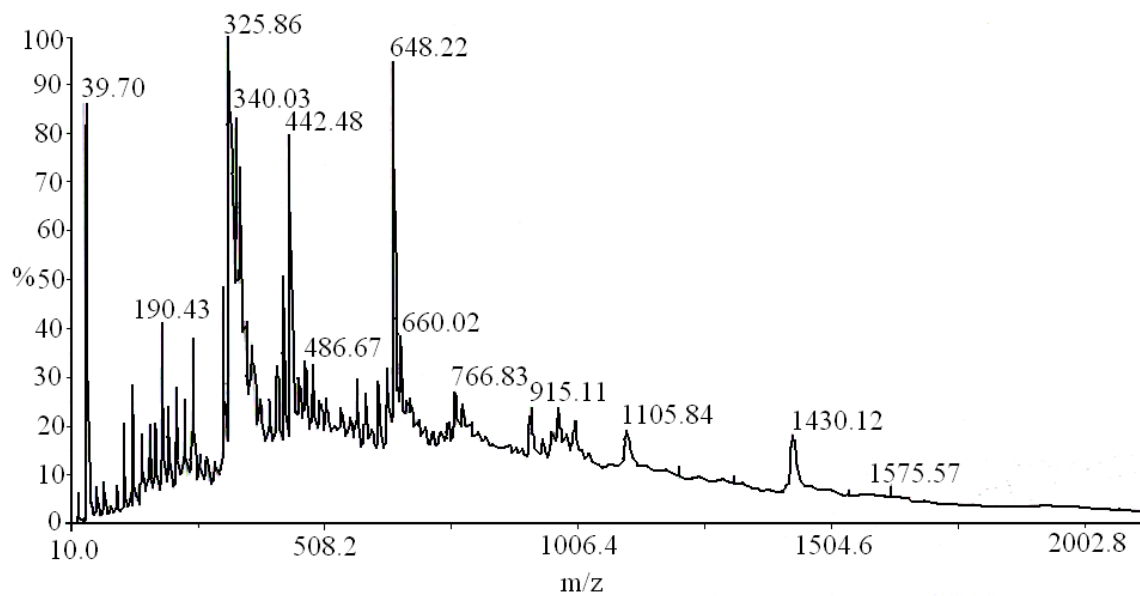

**Figure S6.** ESI mass spectrum of  $[\text{Zn}(\text{tpty})\text{Cl}_2]$  (**3**)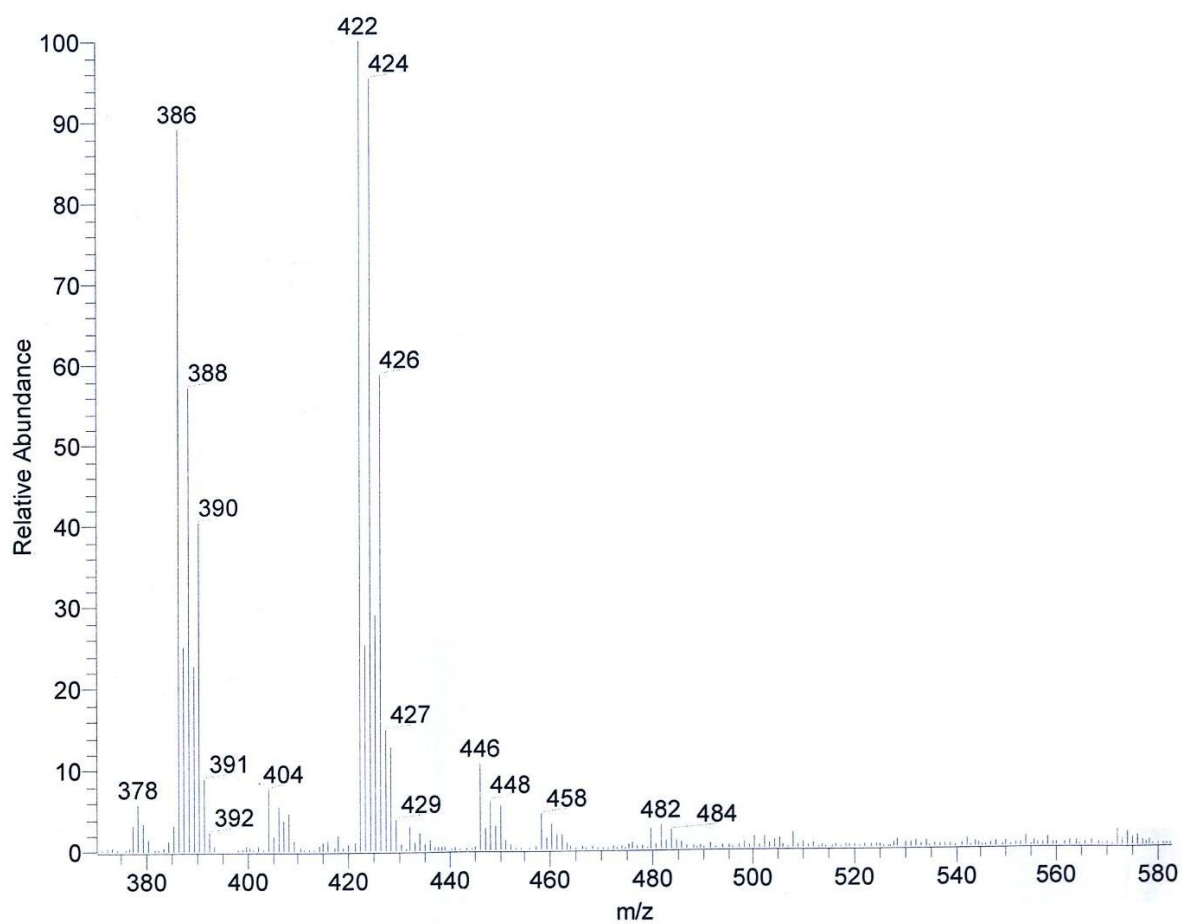**Figure S7.** ESI mass spectrum of  $[\text{Ru}(\text{tpty})(\text{L}^1)](\text{PF}_6)_2$  (**4**).

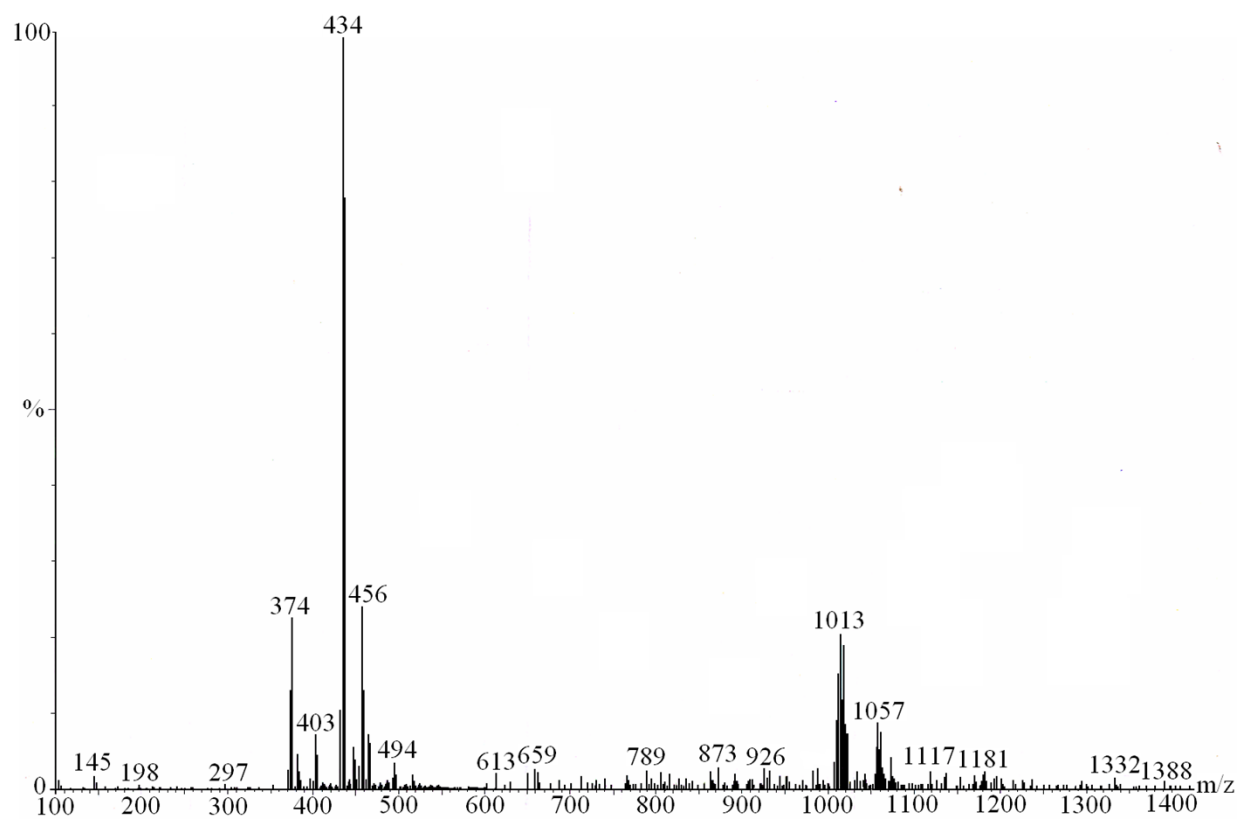

**Figure S8.** ESI mass spectrum of  $[\{\text{Ru}(\text{tpy})\}_2(\text{L}^2)](\text{PF}_6)_4$  (**5**).

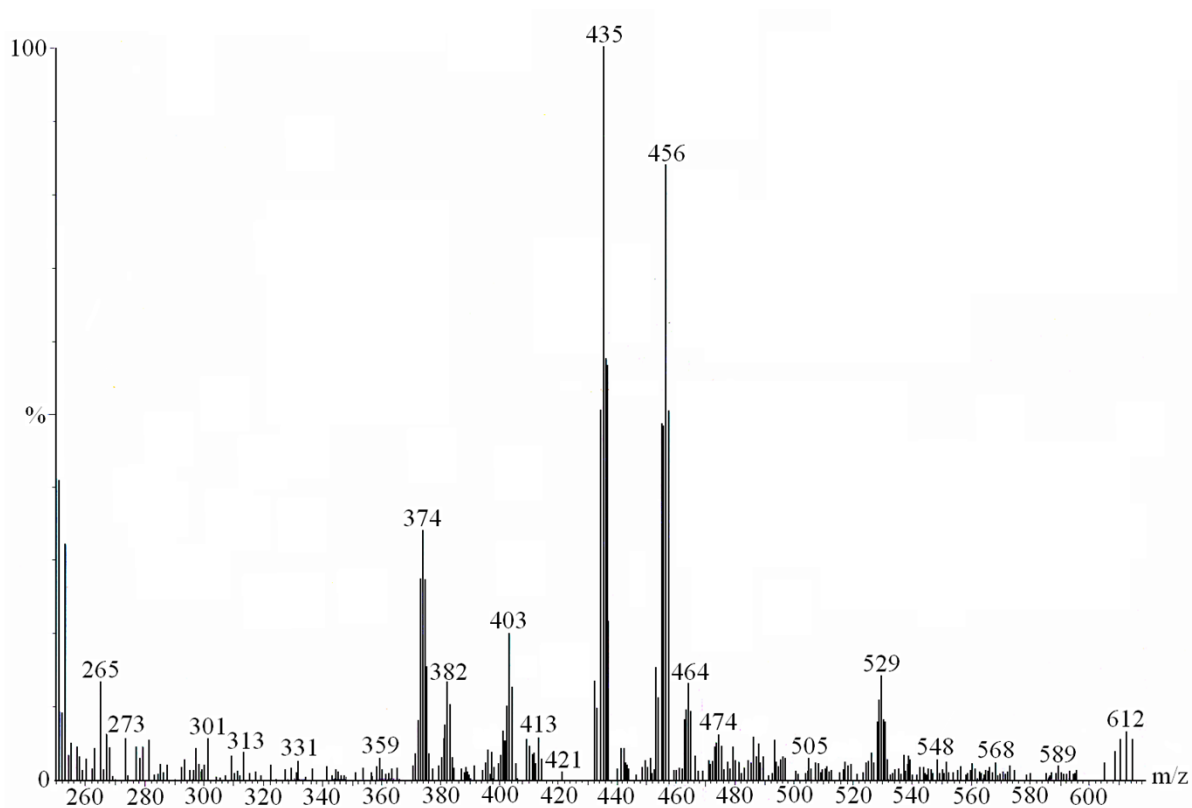

**Figure S9.** The ESI mass spectrum of  $[\text{Tb}(\text{NO}_3)_2(\text{L}^2)\{\text{Ru}(\text{tpy})\}_2](\text{PF}_6)_5$  (**6**).



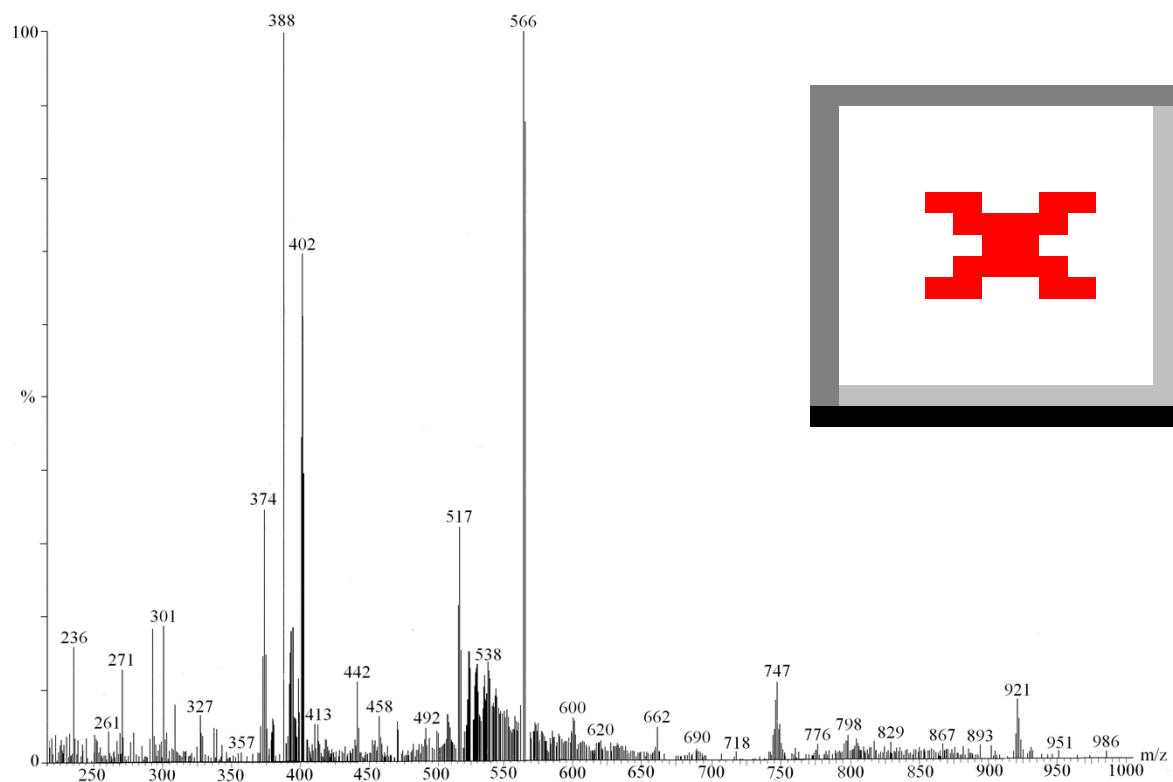

**Figure S10.** Electronic absorption spectrum of  $L^2$  in acetonitrile at 25 °C.

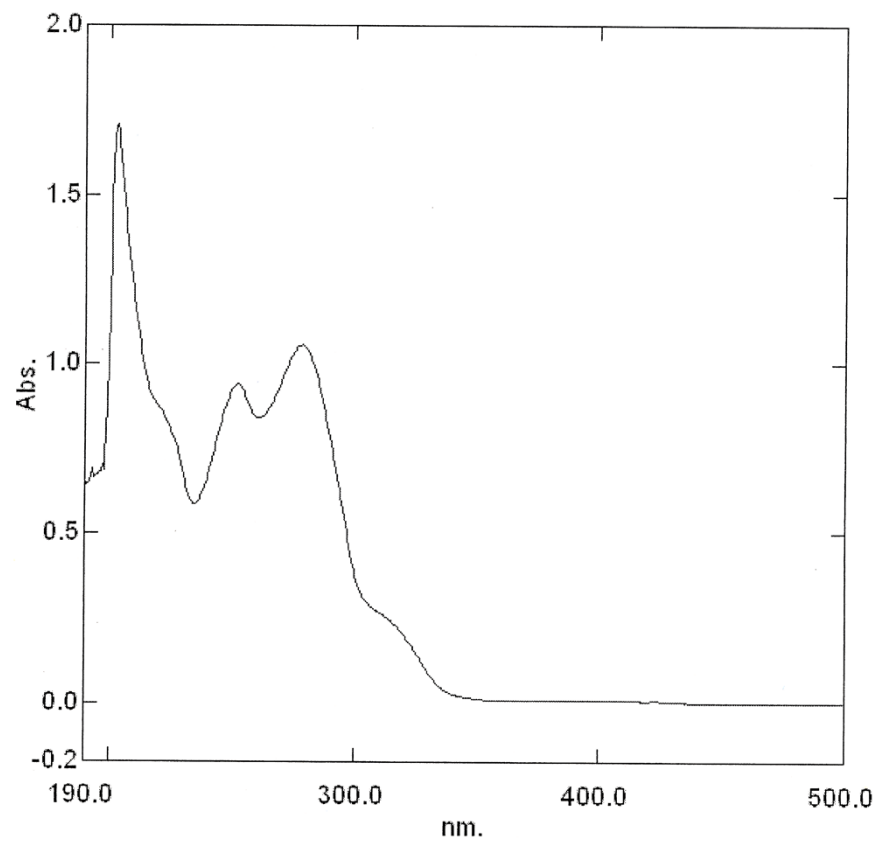

**Figure S11.** Emission spectrum of L<sup>2</sup> ( $\lambda_{\text{ex}} = 267 \text{ nm}$ ) in acetonitrile at 25 °C.

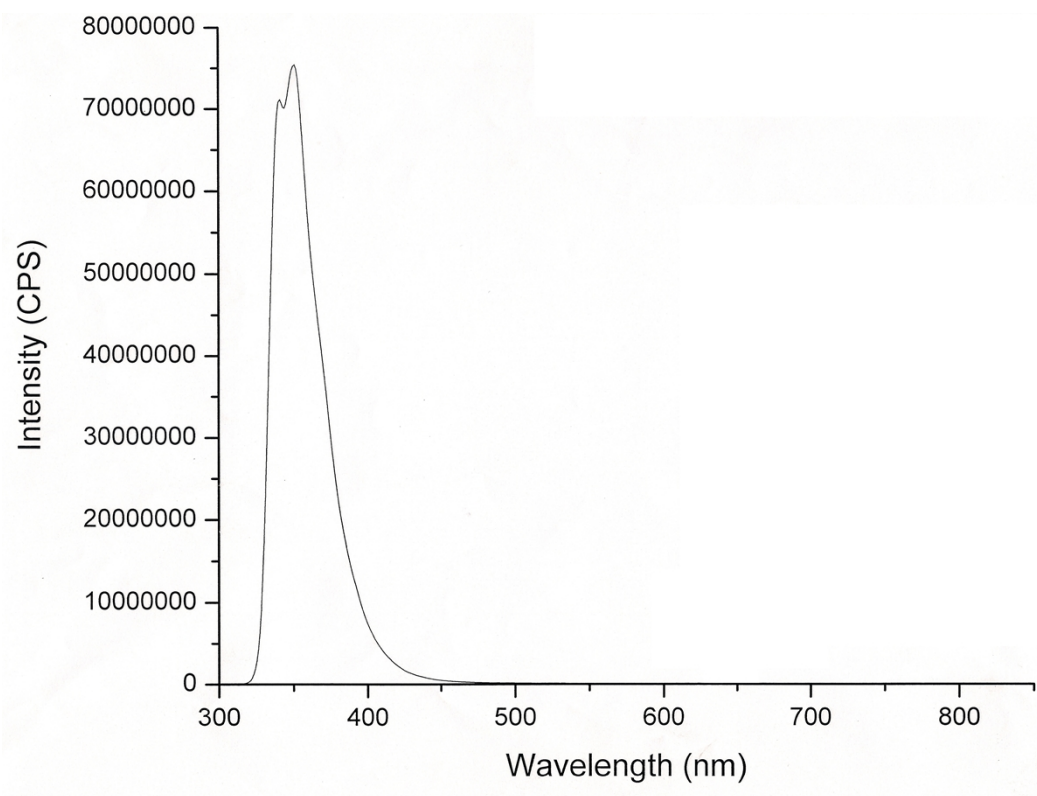

**Figure S12.** Electronic absorption spectrum of **2** in acetonitrile at 25 °C.

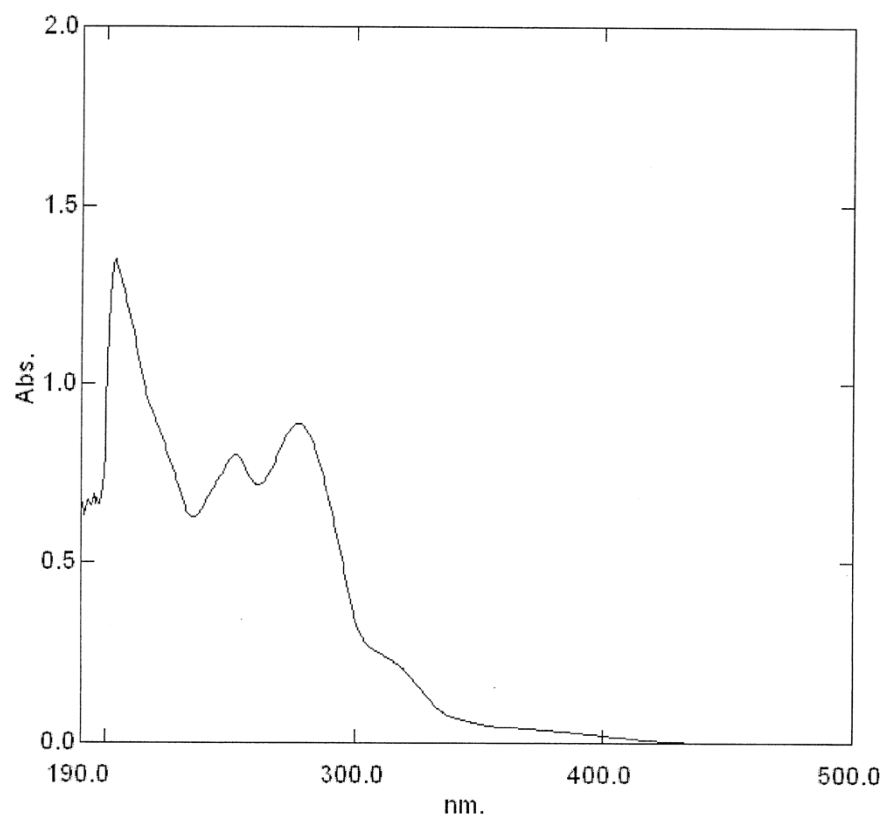

**Figure S13.** Excitation spectrum of **2** (a) ( $\lambda_{em} = 545$  nm), **5** (b) ( $\lambda_{em} = 698$  nm), **6** (c) ( $\lambda_{em} = 687$  nm) and **7** (d) ( $\lambda_{em} = 543$  nm) in acetonitrile at 25 °C.

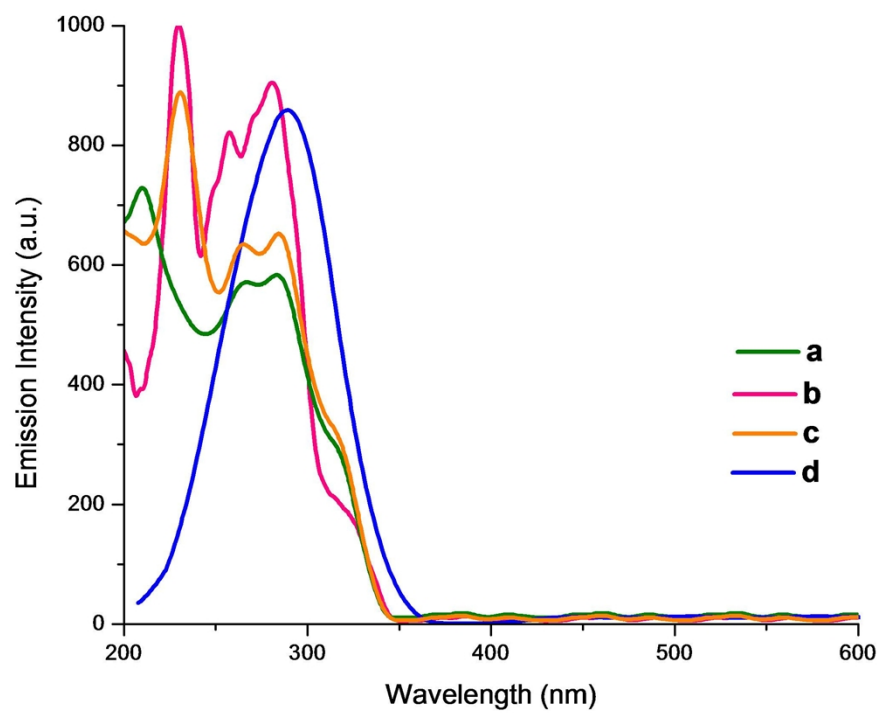

**Figure S14.** Electronic absorption spectrum of  $[\text{Tb}(\text{NO}_3)_2(\text{L}^2)\{\text{Zn}(\text{ttpy})\}_2](\text{NO}_3)\text{Cl}_4$  (**7**) in acetonitrile.

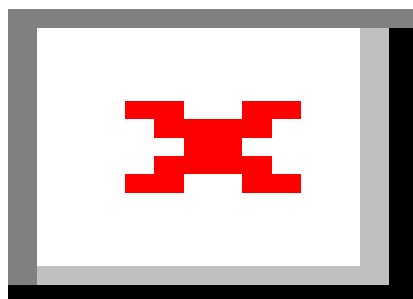

**Figure S15.** Emission spectrum of  $[\text{Tb}(\text{NO}_3)_2(\text{L}^2)\{\text{Zn}(\text{ttpy})\}_2](\text{NO}_3)\text{Cl}_4$  (**7**) ( $\lambda_{\text{ex}} = 288$  nm) in acetonitrile at 25 °C.

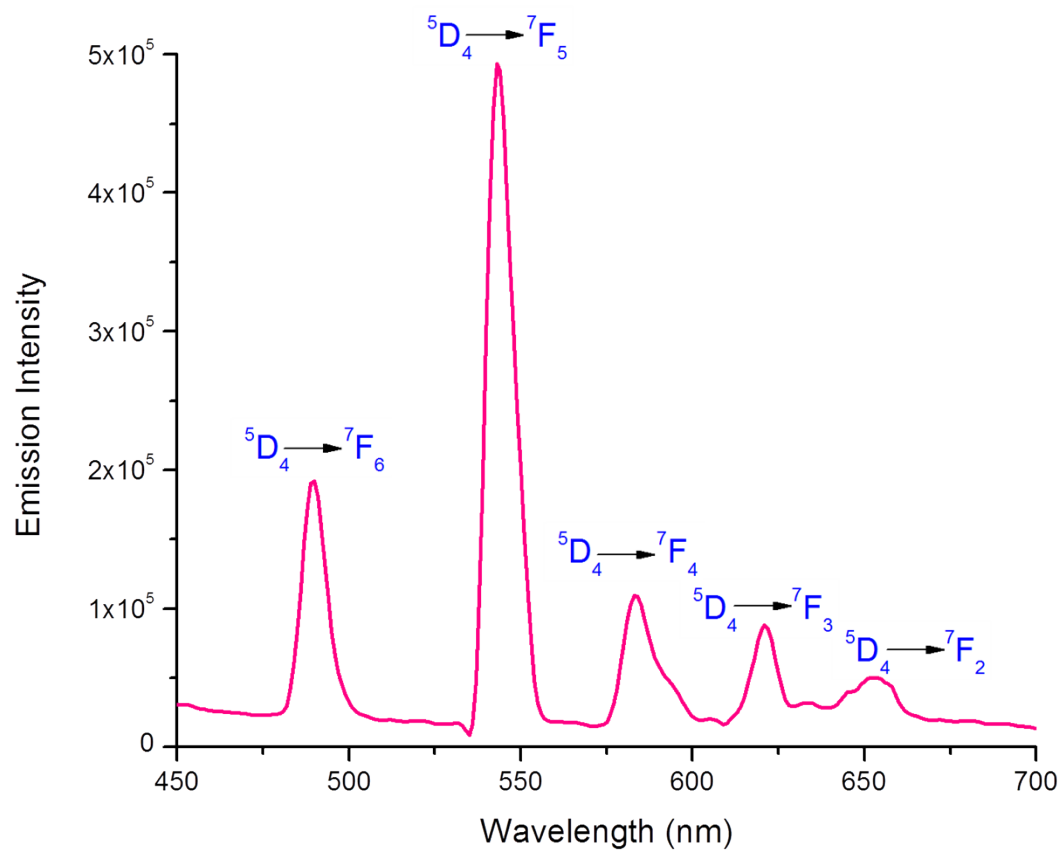

**Figure S16.** The cyclic voltammogram of [ $\{\text{Ru}(\text{ttpy})\}_2(\text{L}^2)\text{](PF}_6)_4$  (**5**) on a glassy carbon millielectrode in acetonitrile (0.1 M tetraethylammonium perchlorate) in the potential range 0 to 2 V versus Ag/AgCl at 25 °C, scan rate = 50 mV s<sup>-1</sup>.

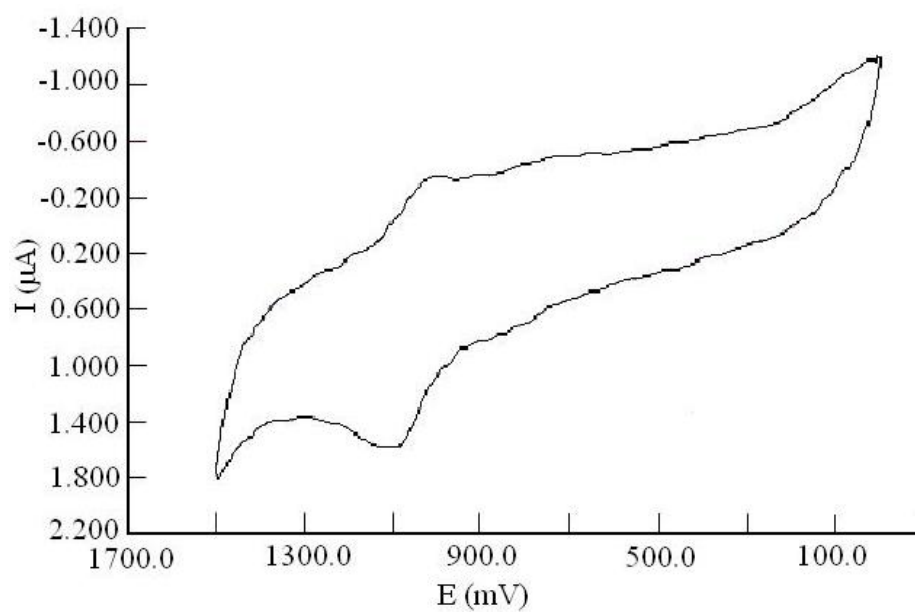



**Figure S17.** The cyclic voltammogram of [ $\{\text{Ru}(\text{tpy})\}_2(\text{L}^2)\text{](PF}_6)_4$  (**5**) on a glassy carbon millielectrode in acetonitrile (0.1 M tetraethylammonium perchlorate) in the potential range 0 to  $-2$  V versus Ag/AgCl at  $25$  °C, scan rate =  $50$   $\text{mV s}^{-1}$ .

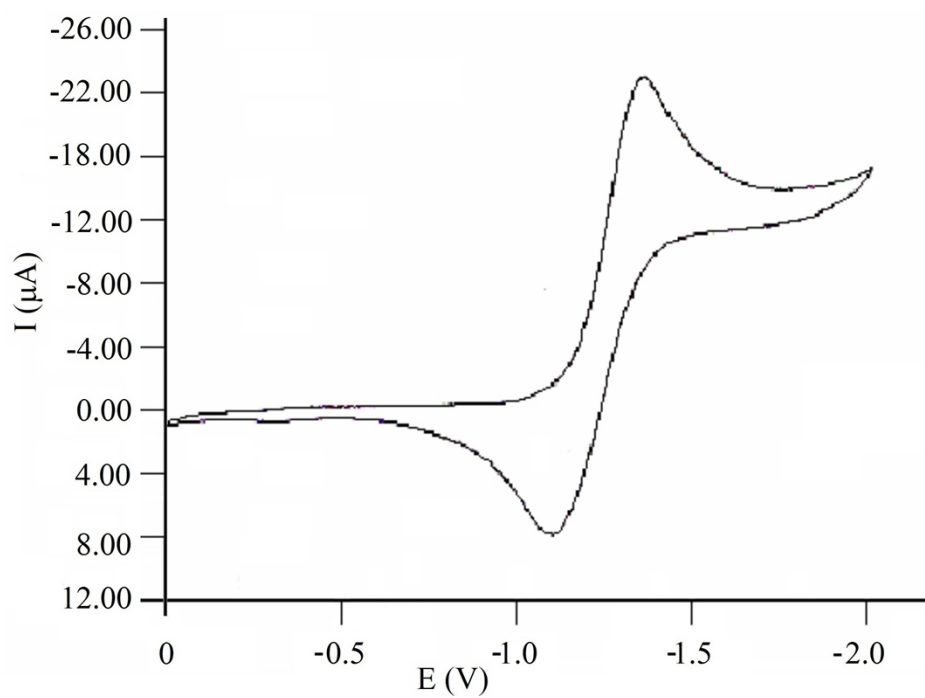

**Figure S18.** The cyclic voltammogram of  $[\text{Tb}(\text{NO}_3)_2(\text{L}^2)\{\text{Ru}(\text{ttpy})\}_2](\text{PF}_6)_5$  (**6**) in the potential range 0 to 1.2 V versus  $\text{Ag}/\text{Ag}^+$  on a glassy carbon millielectrode in acetonitrile (0.1 M tetraethylammonium perchlorate) at 25 °C, scan rate = 50  $\text{mV s}^{-1}$ .

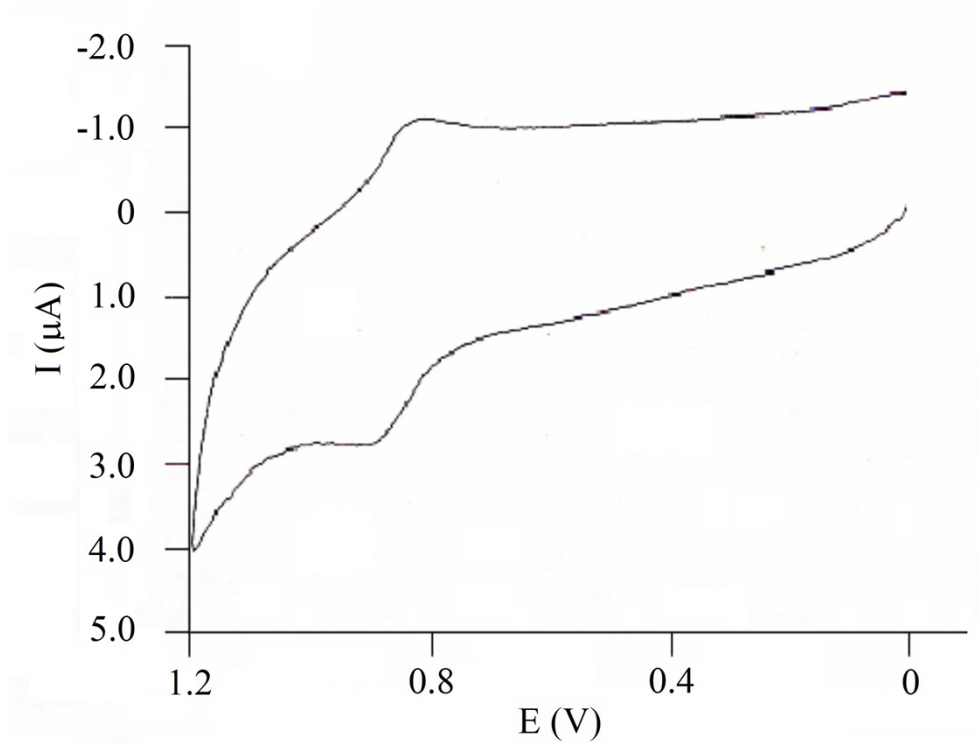

**Figure S19.** The cyclic voltammogram of  $[\text{Tb}(\text{NO}_3)_2(\text{L}^2)\{\text{Ru}(\text{ttpy})\}_2](\text{PF}_6)_5$  (**6**) in the potential range 0 to  $-2$  V versus  $\text{Ag}/\text{Ag}^+$  on a glassy carbon millielectrode in acetonitrile (0.1 M tetraethylammonium perchlorate) at  $25$  °C, scan rate =  $50$   $\text{mV s}^{-1}$ .

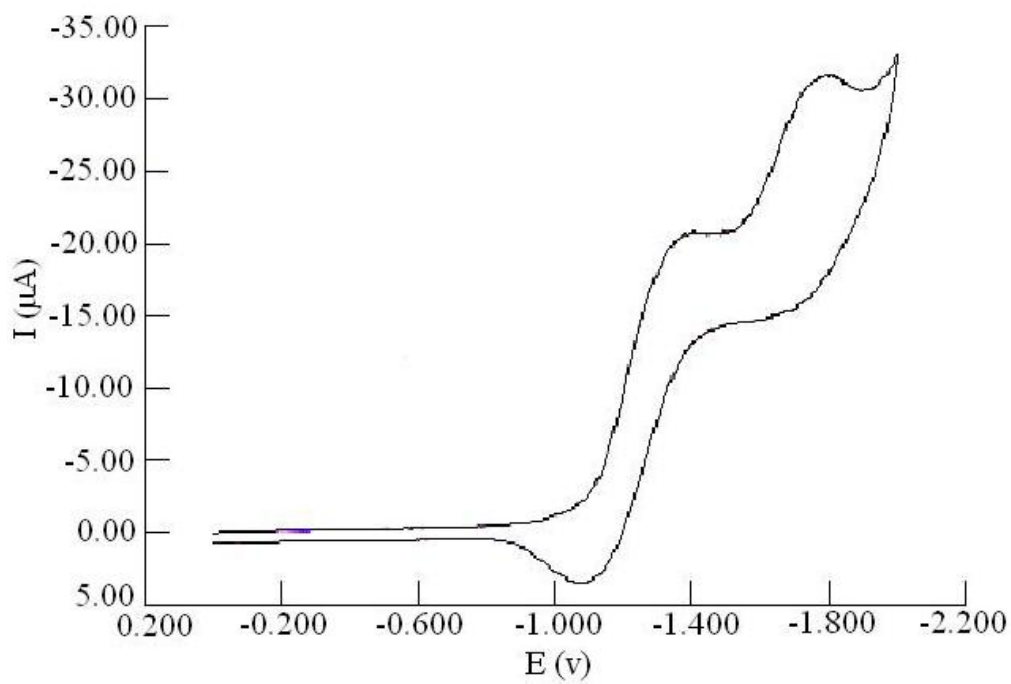

**Figure S20.** The cyclic voltammogram of  $[\text{Tb}(\text{NO}_3)_2(\text{L}^2)\{\text{Zn}(\text{ttpy})\}_2](\text{NO}_3)\text{Cl}_4$  (**7**) in the potential range -1 to -2 V versus  $\text{Ag}/\text{Ag}^+$  on a glassy carbon millielectrode in acetonitrile (0.1 M tetraethylammonium perchlorate) at 25 °C, scan rate = 50  $\text{mV s}^{-1}$ .

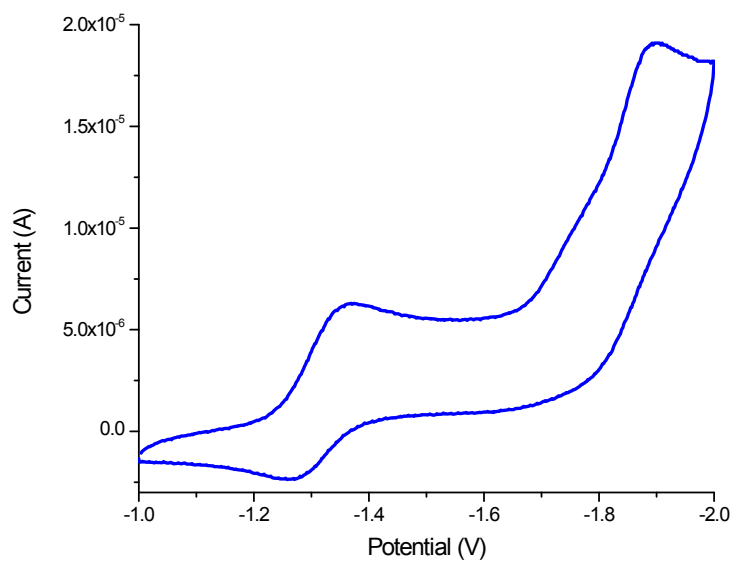

Supplement: c5nj00082c1.pdf [file c5nj00082c1.pdf]
